# Supplementary material
Source: publisher site journal article supplement (https://www.dovepress.com/article/362607)
Supplement: Supplementary file 1 [file get_supplementary_file.php]

**Table S1** Different models tested to fit nifedipine data

| Structure Model | OFV | AIC | Parameter | Estimate | CV (%) | IIV (%) |
| --- | --- | --- | --- | --- | --- | --- |
| First-order absorption, first-order elimination | 5170.0 | 5184.0 | tvKa(1/h) | 0.18 | 29.68 | 53.33 |
| tvV(L) | 2656.72 | 19.71 | 116.80 |
| tvKe(1/h) | 0.02 | 23.52 | 17.88 |
| stdev0 | 8.49 | 3.39 |  |
|  |  |  |  |  |  |  |
| First-order absorption, zero-order elimination | 5236.7 | 5250.7 | tvKa(1/h) | 0.51 | 39.52 | 58.03 |
| tvV(L) | 8087.91 | 4.84 | 173.22 |
| tvK01(mg/h) | 1.00E-09 | 39.90 | 54.91 |
| stdev0 | 9.22 | 3.21 |  |
|  |  |  |  |  |  |  |
| First-order absorption, zero and first-order elimination | 5170.0 | 5188.0 | tvKa(1/h) | 0.18 | 31.11 | 53.42 |
| tvV(L) | 2642.27 | 23.50 | 116.37 |
| tvK01(mg/h) | 0.92E-6 | 31.27 | 56.22 |
| tvKe(1/h) | 0.021 | 28.29 | 17.50 |
| stdev0 | 8.49 | 3.52 |  |
|  |  |  |  |  |  |  |
| Zero-order absorption, first-order elimination | 5141.5 | 5155.5 | tvV(L) | 2611.08 | 6.01 | 51.58 |
| tvKe(1/h) | 0.02 | 3.54 | 27.01 |
| tvK0(mg/h) | 3.96 | 2.18 | 63.02 |
| stdev0 | 8.13 | 1.78 |  |
|  |  |  |  |  |  |  |
| Zero and first-order absorption, first-order elimination | 5166.3 | 5188.3 | tvV(L) | 1995.95 | 31.30 | 31.43 |
| tvKe(1/h) | 0.017 | 17.12 | 8.01 |
| tvKa(1/h) | 0.21 | 22.26 | 131.52 |
| tvK0(mg/h) | 51.79 | 33.21 | 43.04 |
| tvF | 0.29 | 32.90 | 51.08 |
| stdev0 | 8.54 | 3.42 |  |

AIC, Akaike information criterion; OFV, objective function value; stdev0, intra variation in additive residual error model; K0, zero-order absorption rate constant; K01, zero-first order absorption rate constant; Ka, first-order absorption rate constant; Ke, first-order elimination rate constant; V, apparent distribution volume; IIV, inter individual variation.

**Table S2** Fitting parameters of optimized base model

| Parameter | Estimate | CV(%) | 95%CI | IIV(%) |
| --- | --- | --- | --- | --- |
| *V/F*(L) | 2462.7 | 2.42 | 2344.7 – 2580.8 | 59.4 |
| *CL/ F* (L/h) | 53.3 | 2.18 | 51.0 – 55.6 | 63.6 |
| K0(mg/h) | 3.95 | 2.50 | 3.76 – 4.14 | 56.2 |
| stdev0 | 8.13 | 2.87 | 7.66 – 8.59 |  |

V, apparent distribution volume; CL, clearance; K0, the zero-order absorption rate constant; stdev0, intra variation in additive residual effect model; IIV, inter individual variation.
